# Supplementary material
Source: PubMed Central journal article supplement (PMC8206392)
Supplement: mmc1.pdf [file mmc1.pdf]

The American Journal of Human Genetics, Volume 108

**Supplemental information**

**Altered replication stress response  
due to *CARD14* mutations promotes  
recombination-induced revertant mosaicism**

**Toshinari Miyauchi, Shotaro Suzuki, Masae Takeda, Jin Teng Peh, Masayuki Aiba, Ken Natsuga, Yasuyuki Fujita, Takuya Takeichi, Taiko Sakamoto, Masashi Akiyama, Hiroshi Shimizu, and Toshifumi Nomura**



## **Figure S1. Clinical and histological features of individual 1 and 2**

(A-C) Generalized scaly erythema (A) and palmoplantar keratoderma (B and C) were observed in individual 1. Joint contractures of the fingers were also noted (B). Although the patient was originally diagnosed as having congenital ichthyosiform erythroderma at the timing of previous publications, we performed whole-exome sequencing in this study, which led to identification of a pathogenic *CARD14* mutation. In contrast, no pathogenic variants were identified in any of the known causative genes for non-syndromic ichthyoses, including congenital ichthyosiform erythroderma (See Table S1). Based on these findings, we ultimately diagnosed the patient as having PRPV.

(D-F) Individual 2 exhibited skin symptoms similar to individual 1.

(G-K) Both patients showed multiple normal-appearing spots. Skin biopsy was taken from the left forearm (G), left anterior chest (H), and right neck (I) of individual 1 and from the left thigh (J) and left lower leg (K) of individual 2.

(L) Normal skin structure and structural changes due to *CARD14* mutations. The epidermis (the outermost layer of the skin) is composed of layers of epithelial cells (keratinocytes). Beneath the epidermis lies the dermis comprising connective tissues and housing various appendages including blood vessels, hair follicles, sweat glands, and other structures. The normal epidermis has four layers: basal layer (B), spinous layer (S), granular layer (G), and stratum corneum (SC). Proliferative epidermal progenitors reside in basal layer, and all the cells above this layer are differentiated cells. Histology of the skin with *CARD14* mutations shows epidermal thickening (acanthosis), lack of a granular layer, and thickening of stratum corneum (hyperkeratosis) with retained nuclei (parakeratosis).

(M and N) Histological comparison between affected skin and revertant spots of individual 1 (M) and individual 2 (N). Hematoxylin and eosin staining. Scale bars, 100  $\mu\text{m}$ .

(O) Schematic comparison among normal skin, PRPV skin, and revertant spot. The birth of a revertant cell via mitotic recombination and its clonal expansion leads to the appearance of clinically visible revertant spot.

**Figure S2**

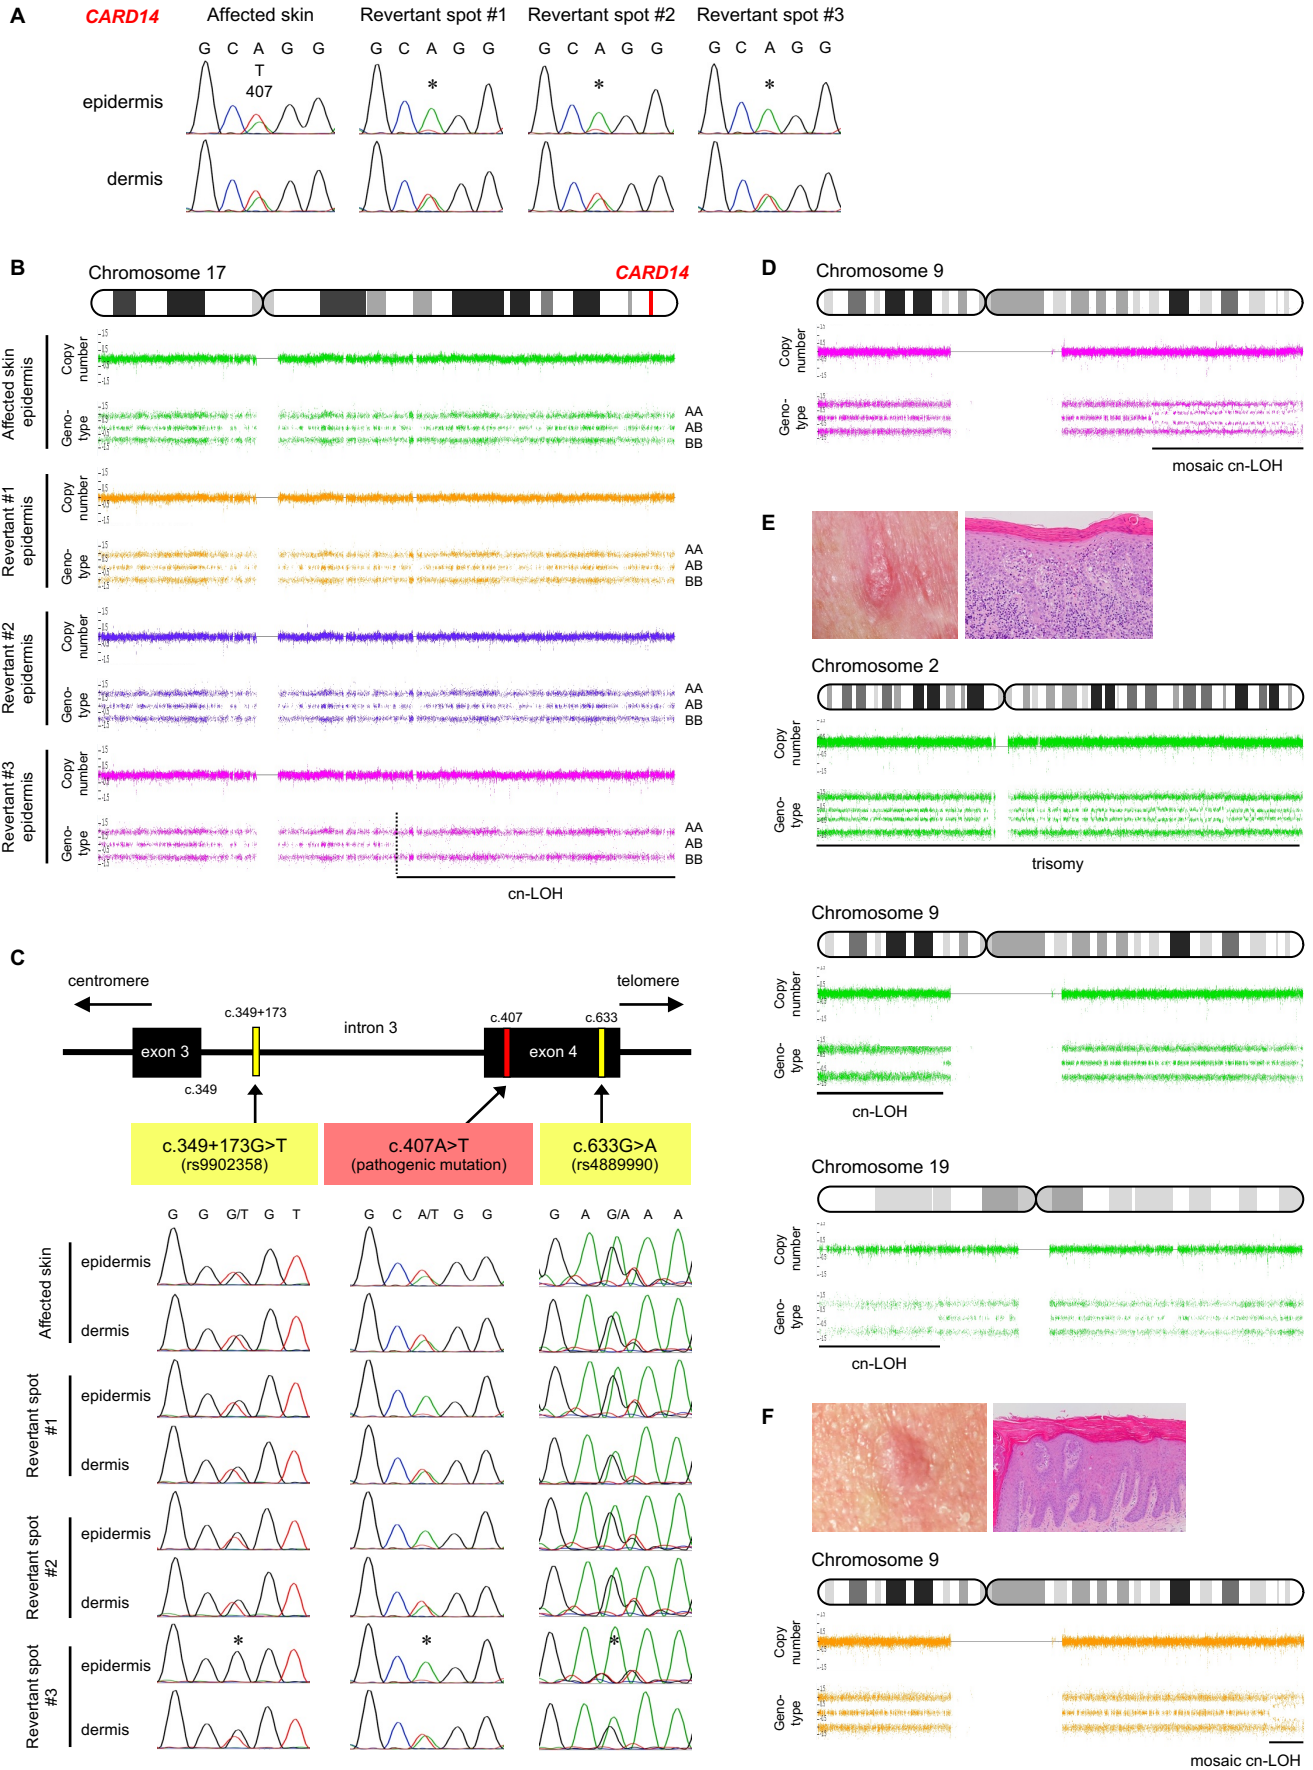

## Figure S2. Genetic features of individual 1 and 2

(A) Mutation analysis of *CARD14* using genomic DNA extracted from skin samples in individual 2. The heterozygous missense mutation, c.407A>T, is absent in the revertant epidermis (\*).

(B) SNP array data of chromosome 17 from individual 2. LOH was identified in 1 of 3 revertant spots. Dotted lines represent the breakpoint of recombination.

(C) Heterozygous SNPs (c.349+173G>T and c.633G>A) on both sides closest to the pathogenic mutation in individual 2 were absent in the epidermis of revertant spot #3 (\*) but were still present in the epidermis of revertant spots #1 and #2. Back mutation most likely explains the genetic reversion in revertant spots #1 and #2.

(D) Revertant spot #2 of individual 1 also harbors mosaic cn-LOH on chromosome 9.

(E and F) Clinical, pathological, and genetic features of SCC in situ arising on the left neck

(E) and the posterior neck (F) of individual 1.

**Figure S3**

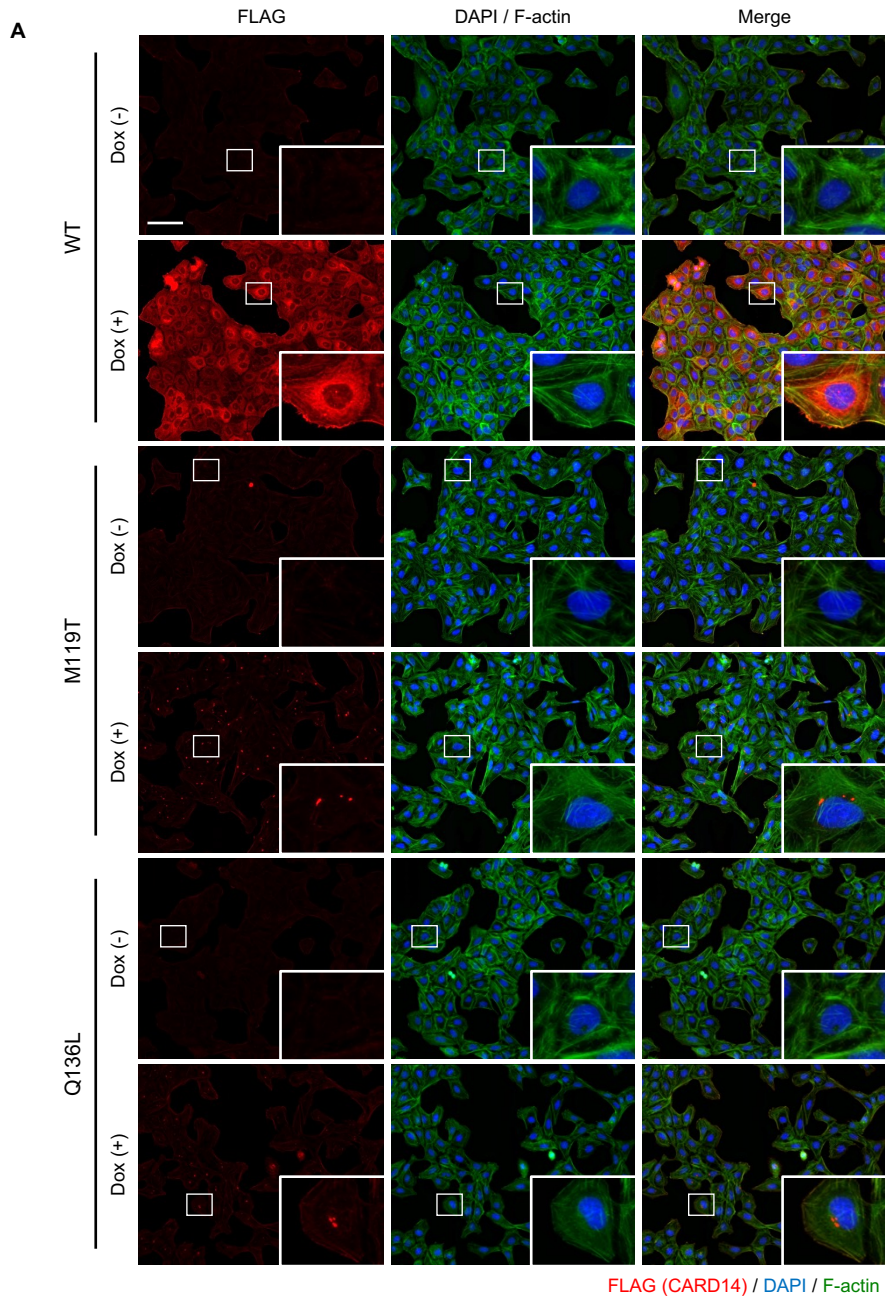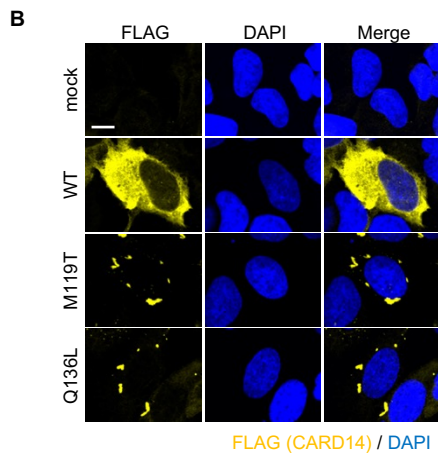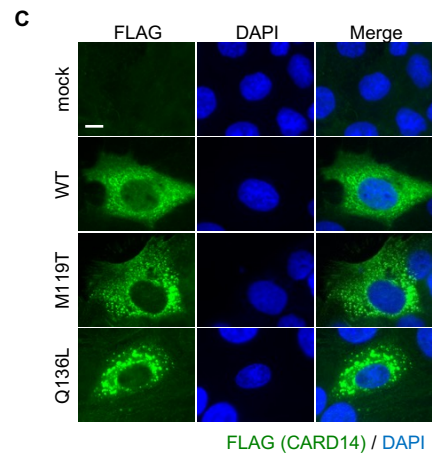

**Figure S3. immunofluorescence microscopy revealing intracellular CARD14**

**localization**

(A) Immunofluorescence of CARD14 cell lines incubated with or without Dox for 24 h.

Insets represent a high magnification of the area indicated in the boxes. Scale bar, 100  $\mu\text{m}$ .

(B and C) Aberrant distribution of mut-CARD14 was further confirmed by transient overexpression analyses using U2OS cells (B) and HaCaT cells (C). Scale bar, 10  $\mu\text{m}$ . WT, wild-type; M119T, p.Met119Thr; Q136L, p.Gln136Leu.



**Figure S4**

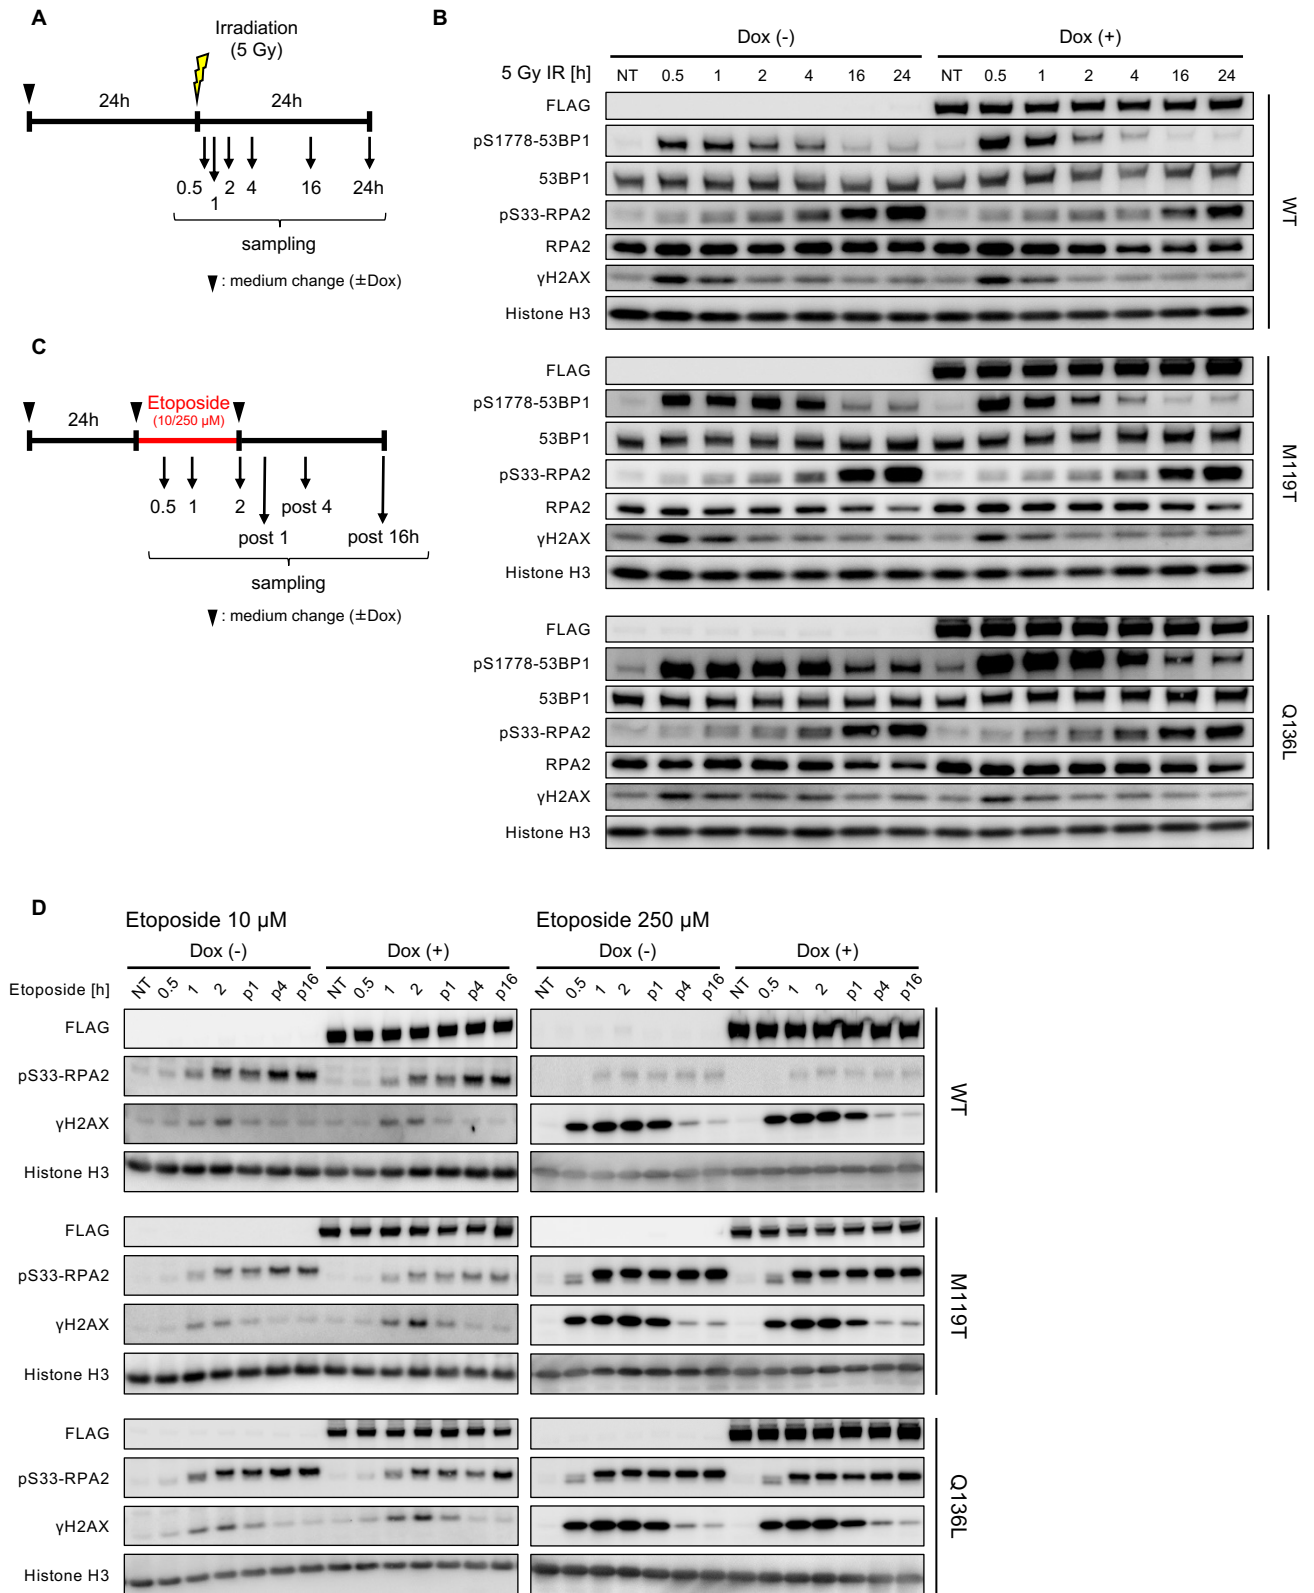

**Figure S4. Mut-CARD14 expression provides no difference in the DNA damage response**

(A) Schematic depicting timeline of when cells were exposed to 5 Gy IR. Whole-cell lysate was prepared at indicated times.

(B) Immunoblots showing the levels of DNA damage and the activation of 53BP1 and RPA2 following irradiation. pS1778-53BP1, phospho-Ser1778 53BP1. pS33-RPA2, phospho-Ser33 RPA2. NT, non-treatment.

(C) Schematic depicting timeline of when cells were exposed to 10 or 250  $\mu$ M etoposide and when the samples were obtained.

(D) Whole-cell lysate was immunoblotted with the indicated antibodies. p1/4/16, post 1/4/16 h. NT, non-treatment; WT, wild-type; M119T, p.Met119Thr; Q136L, p.Gln136Leu.



### **Figure S5. Measurement of HR-mediated DSB repair frequency**

(A) Schematic showing the process of EGFP expression in DR-GFP assay. *SceGFP* gene contains I-SceI endonuclease site and cellular I-SceI expression leads to a DSB at this site. The DSB can be repaired by HR using downstream wild-type GFP sequence (iGFP) as a template, resulting in EGFP expression.

(B and C) Schematic depicting timeline of DR-GFP assay and when transient transfection of the DR-GFP reporter (pDRGFP) and I-SceI (pCBASceI) vectors was used (B). EGFP positive cells did not appear when U2OS cells were transfected with only pDRGFP but appeared when transfected with both pDRGFP and pCBASceI (C). DR-GFP assay works well even in transient transfection system; n = 3 independent experiments; error bars represent SEM.

(D) DR-GFP assay by transient transfection revealed that neither wt-CARD14 nor mut-CARD14 increased HR frequency; n = 3 independent experiments. Error bars represent SEM

(E and F) Schematic of DR-GFP assay using U2OS cells stably expressing the DR-GFP reporter (E). In this assay, pCBASceI ± p3FLAG-CARD14 were transiently transfected (E). Again, neither wt-CARD14 nor mut-CARD14 promoted HR (F); n = 3 independent experiments; error bars represent SEM NT, non-treatment. Statistical significance was calculated using one-way ANOVA followed by a multiple comparisons test. \* $P < 0.05$ , \*\* $P < 0.01$ , \*\*\*\* $P < 0.0001$ ; ns, not significant. WT, wild-type; M119T, p.Met119Thr; Q136L, p.Gln136Leu.



## **Figure S6. Effect of Mut-CARD14 expression on dna replication**

(A) Cell cycle profiles of CARD14 cell lines at 24 h following Dox addition. For each sample, 30,000 cells were analyzed; n = 3 independent experiments; Error bars represent SEM.

(B) Representative histograms of DNA content of CARD14 cell lines 24, 48, 72 h following Dox addition.

(C) Schematic depicting timeline of how cells are labeled with CldU and IdU.

Representative images of a stalled fork, new origin firing, and ongoing fork are also shown.

(D) Comparison of replication fork velocity with or without Dox. At least 500 fibers for each cell line were quantified. Experiments were repeated at least thrice, and similar results were obtained each time. Horizontal lines represent mean values  $\pm$  SEM. Statistical significance was calculated using the Mann-Whitney U test. ns, not significant.

(E-G) Quantification of the percentage of stalled forks (E), new origin firings (F), and ongoing forks (G) to all CldU-labeled forks; n = 3 independent experiments; error bars represent SEM. Statistical significance was calculated using the two-tailed *t*-test. ns, not significant.

(H) Schematic depicting timeline of when cells were treated with 2  $\mu$ g/ml APH and when samples were obtained. Whole-cell lysate was immunoblotted with indicated antibodies. Prolonged APH treatment increased  $\gamma$ H2AX in the presence of mut-CARD14. NT, non-treatment; WT, wild-type; M119T, p.Met119Thr; Q136L, p.Gln136Leu.

**Figure S7**

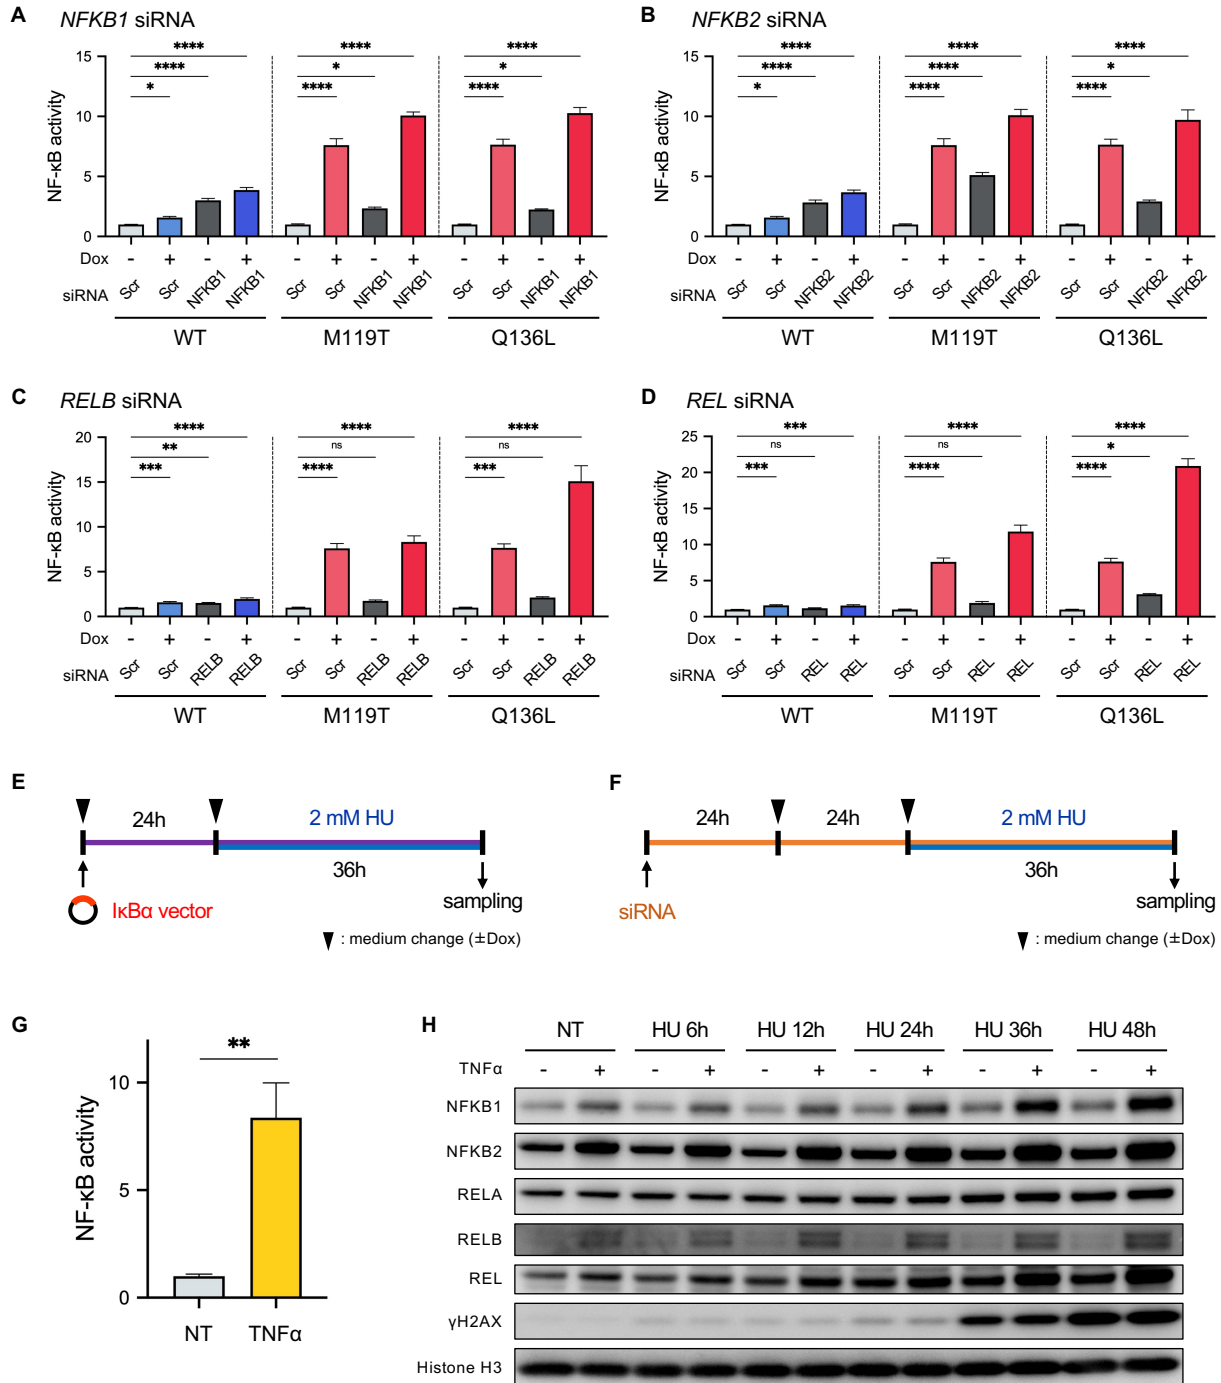

**Figure S7. Association between NF- $\kappa$ B signaling activity and the replication stress response**

(A-D) NF- $\kappa$ B-dependent luciferase assay using CARD14-inducible cell lines to test the effect of depletion of NF- $\kappa$ B subunits, NFKB1 (A), NFKB2 (B), RELB (C), and REL (D); n = 5 independent experiments; error bars represent SEM. Statistical significance was calculated using ordinary one-way ANOVA with multiple comparisons test. \* $P < 0.05$ , \*\* $P < 0.01$ , \*\*\* $P < 0.001$ , \*\*\*\* $P < 0.0001$ ; ns, not significant. Scr, scramble (negative control).

(E and F) Schematic depicting timeline of cells treatment with 2 mM HU following I $\kappa$ B $\alpha$  overexpression (E) or RNA interference of NF- $\kappa$ B subunits (F).

(G) NF- $\kappa$ B-dependent luciferase assay performed using U2OS cells to test the NF- $\kappa$ B-activation potency of TNF $\alpha$ ; n = 4 independent experiments; error bars represent SEM. Statistical significance was calculated using two-tailed  $t$ -test. \*\* $P < 0.01$ .

(H) Immunoblots showing the levels of DNA damage and the expression levels of NF- $\kappa$ B subunits following HU treatment, with or without TNF $\alpha$  stimulation. NT, non-treatment. WT, wild-type; M119T, p.Met119Thr; Q136L, p.Gln136Leu.



**Figure S8**

**A**

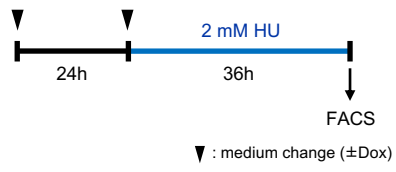

**B**

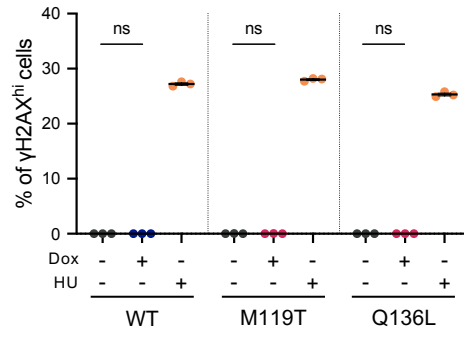

**C**

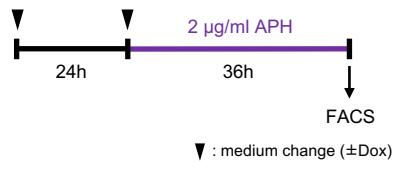

**D**

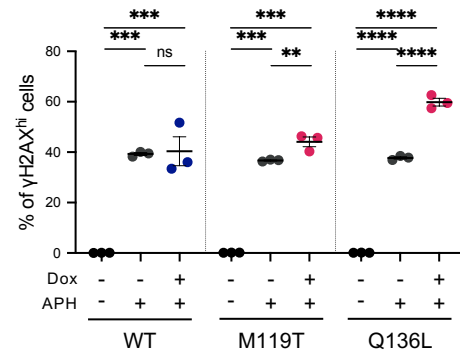

**Figure S8. FACS-based analyses for evaluating the replication stress response**

- (A) Schematic depicting timeline of when cells treated with HU for FACS analysis.
- (B) CARD14 cell lines were incubated in the presence or absence of Dox for 36 h and harvested to estimate the levels of  $\gamma$ H2AX by FACS. CARD14 expression per se did not increase the percentage of  $\gamma$ H2AX<sup>hi</sup> cells.
- (C) Schematic depicting timeline of when cells were treated with APH for FACS analysis.
- (D) A clear increase in the percentage of  $\gamma$ H2AX<sup>hi</sup> cells following APH treatment was observed in mut-CARD14 expressing cells. Statistical significance was calculated using one-way ANOVA with multiple comparisons test.  $**P < 0.01$ ,  $***P < 0.001$ ,  $****P < 0.0001$ ; ns, not significant. WT, wild-type; M119T, p.Met119Thr; Q136L, p.Gln136Leu.

**Figure S9**

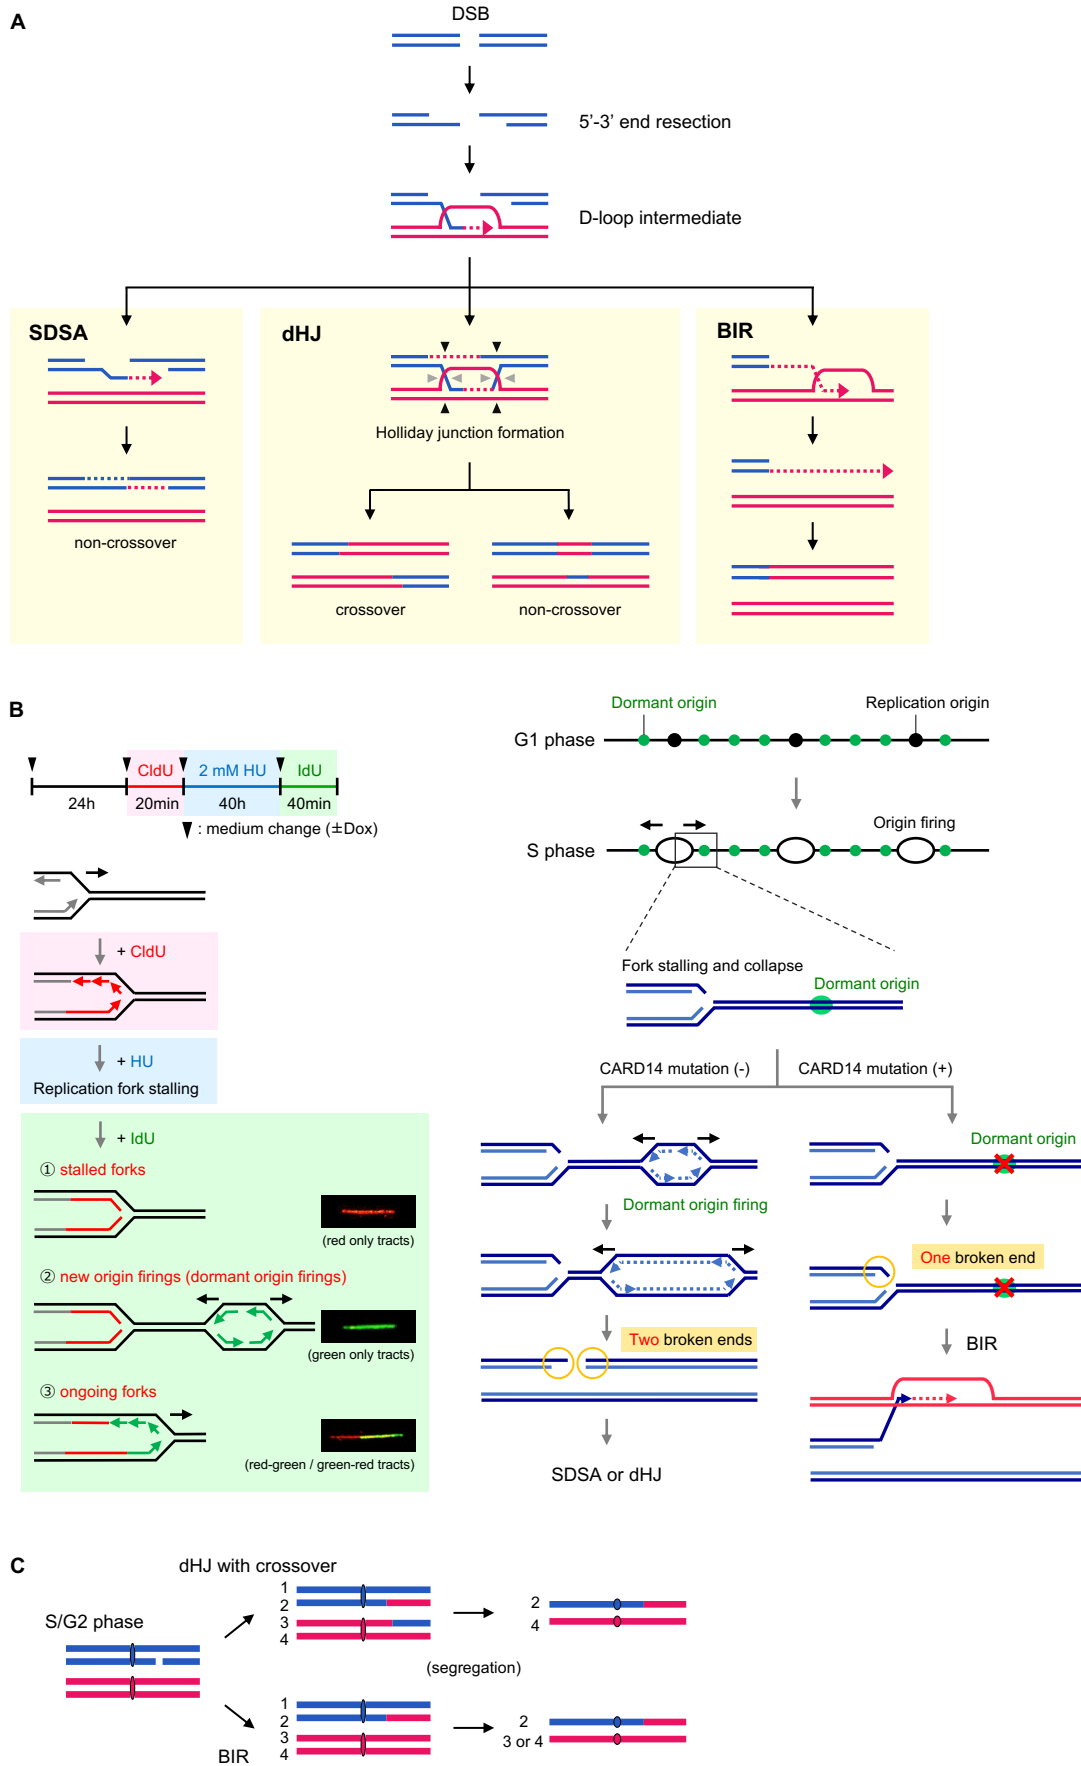

**Figure S9. Three different HR pathways repairing collapsed forks**

(A) HR initiates with a 5'-3' end resection which produces a 3' single-stranded end that invades a homologous template to form a displacement loop (D-loop) intermediate. All three sub-pathways can ensue from this D-loop structure and their outcomes are different. In SDSA, the nascent strand is displaced to anneal to the other 3' single-stranded end, resulting in a non-crossover outcome. In the dHJ pathway, also referred to as DSB repair, the second DNA end is captured by the D-loop and a dHJ intermediate is formed. The following resolution can generate either a crossover (cleavage at black arrowheads on one side and gray arrowheads) or a non-crossover (cleavage at black or gray arrowheads) outcome. In BIR, extensive DNA synthesis from the invading end occurs when only one broken end is available for repair.

(B) Schematic showing the treatment of the cells, and representative images of three types of fibers are shown on the left. Suppression of dormant origin activation can cause the situation in which only one broken end is available for repair.

(C) Long-tract LOH observed in RM can be mediated by two HR pathways, BIR or dHJ, with a crossover outcome. LOH of entire distal regions of chromosomes may arise when DSBs are repaired by these two pathways in S/G2 phase and recombinant sister chromatids segregate to different daughter cells in the M phase.

**Figure S10**

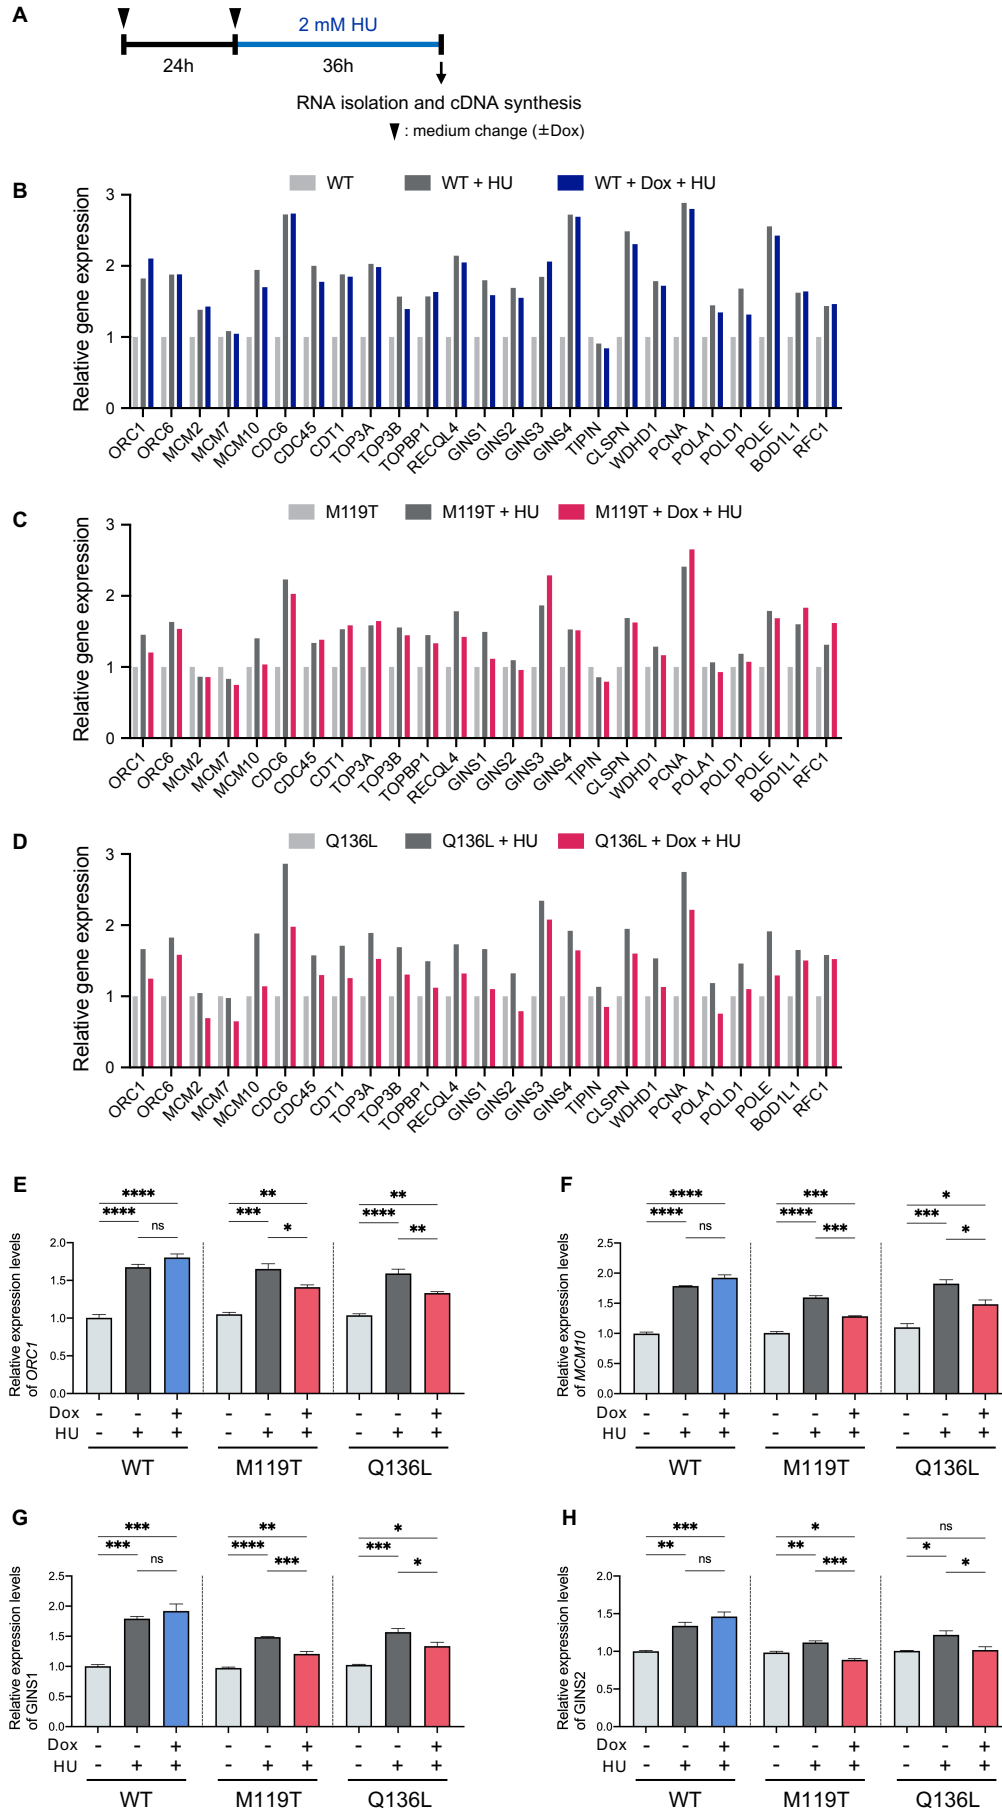

**Figure S10. qPCR screening analysis of replication-related genes revealed the suppressive state of new origin firing in mutant CARD14 expressing cells**

(A-D) RNA was isolated from CARD14 cell lines which were incubated in the presence or absence of Dox for 24 h and with or without 2 mM HU for 36 h (A). Gene expression levels were analyzed by qPCR (n =1 biological replicate, each with two technical replicates) (B-D). Note that expression values were normalized to ACTB expression. (E-H) Gene expression levels of *ORC1* (E), *MCM10* (F), *GINS1* (G), and *GINS2* (H) were further analyzed using the newly prepared samples; n = 3 independent experiments; error bars represent SEM; Statistical significance was calculated using one-way ANOVA with multiple comparisons test. \* $P < 0.05$ , \*\* $P < 0.01$ , \*\*\* $P < 0.001$ , \*\*\*\* $P < 0.0001$ ; ns, not significant. WT, wild-type; M119T, p.Met119Thr; Q136L, p.Gln136Leu.

**Figure S11**

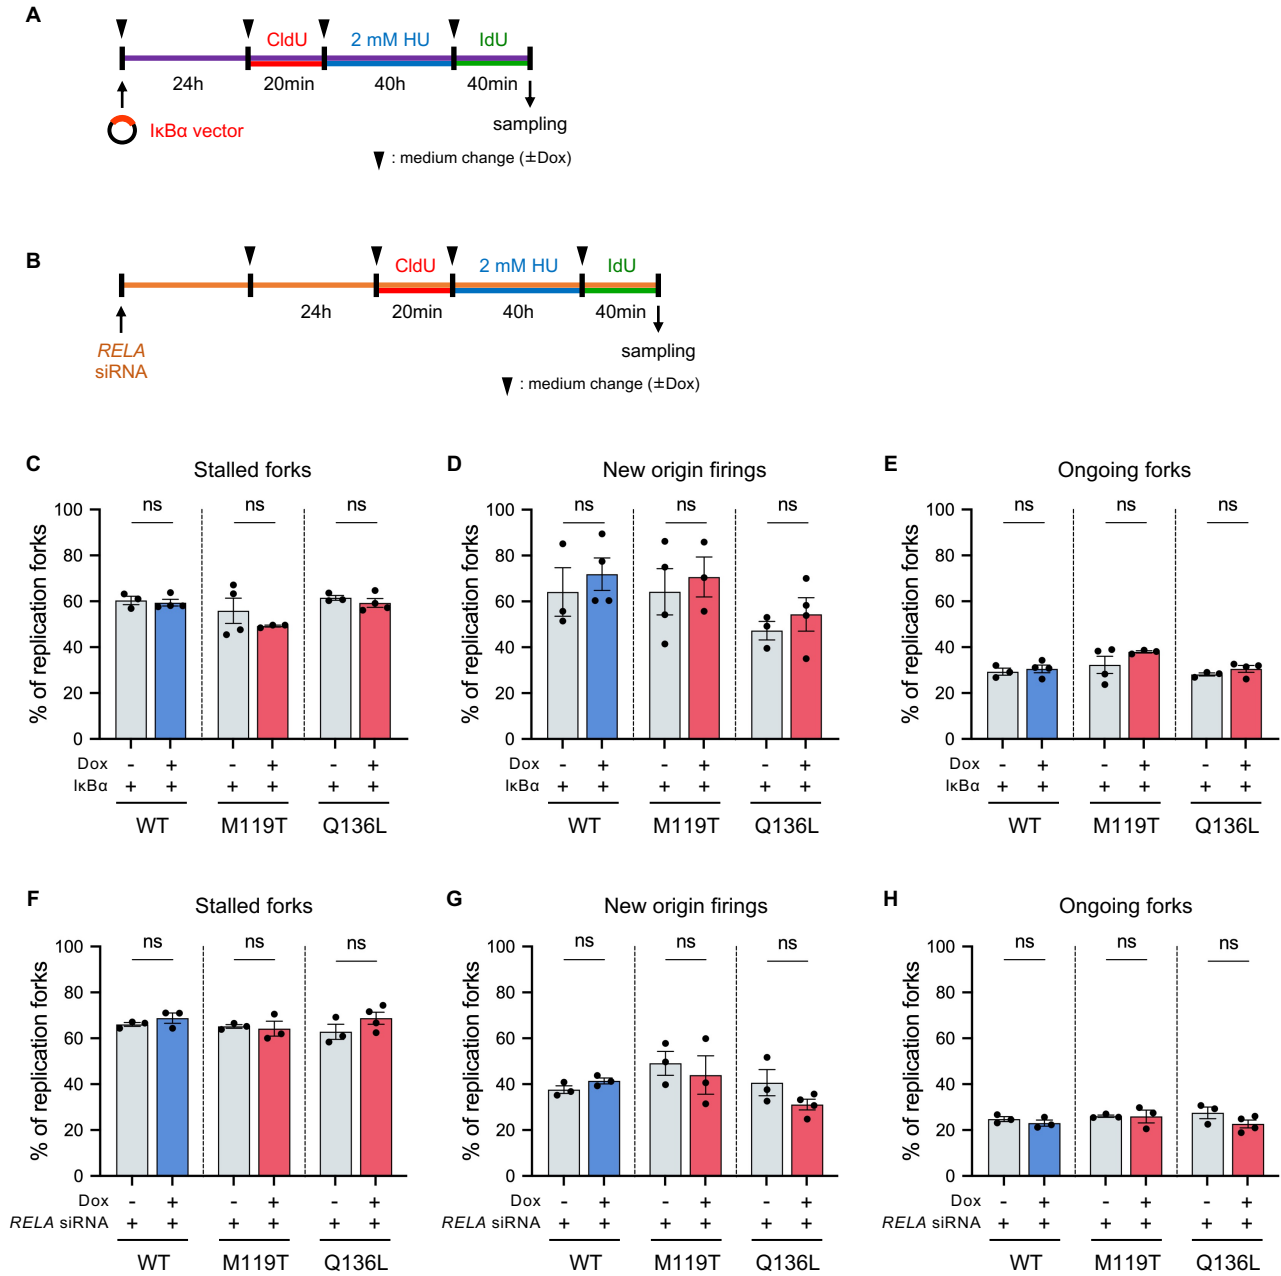

**Figure S11. Alteration of DNA replication dynamics depending on the activity of the NF- $\kappa$ B signaling pathway**

(A and B) Schematic depicting the timeline of cells labeling with CldU and IdU in the presence of HU treatment following I $\kappa$ B $\alpha$  overexpression (A) or RNA interference of RELA (B).

(C-H) Quantification of the percentage of stalled forks (C and F), new origin firings (D and G), and ongoing forks (E and H) to all CldU-labeled forks under the condition of I $\kappa$ B $\alpha$  overexpression (C-E) or RELA depletion (F-H); n = 3 independent experiments; error bars represent SEM. Statistical significance was calculated using the two-tailed t-test. ns, not significant. WT, wild-type; M119T, p.Met119Thr; Q136L, p.Gln136Leu.





**Table S1. Genetic variations of individual 1 in the genes responsible for ichthyoses**

Whole-exome sequencing showed that individual 1 has no pathogenic mutations in the listed genes, all of which are associated with non-syndromic ichthyoses. Genes related to syndromic ichthyoses were excluded from the list, because the patient had no extracutaneous symptoms.

## **Supplemental Material and Methods**

### **Whole-exome sequencing**

Whole-exome sequencing libraries were generated using the SureSelect Human All Exon V6 kit (Agilent Technologies), and enriched fragments were sequenced using the HiSeq 2500 platform (Illumina) with 100-bp paired-end reads to a median of 100× coverage.

Cleaned fastq files were mapped onto the human reference genome version GRCh37 (hg19) using Burrows-Wheeler Aligner (BWA, v.0.7.10). SNVs, insertions, and deletions were called using the UnifiedGenotyper tool in the Genome Analysis Toolkit (GATK, v.1.6.13).

Variants were analyzed using databases, such as the dbSNP (build 154), the 1000 Genomes Project (phase 3 release V3+), the Human Genetic Variation Database (HGVD, version 2.3), and the genome Aggregation Database (gnomAD, v2.1.1).
